# Supplementary material for: Synthesis and characterization of α,ω-dihydroxy-telechelic oligo(p-dioxanone)
Source: Royal Society of Chemistry journal article supplement (doi:10.1039/b707104c), 2007-01-01
Supplement: b707104c.pdf [file b707104c.pdf]

## Supplementary data

### Synthesis and characterization of $\alpha,\omega$ -dihydroxy-telechelic oligo(*p*-dioxanone)

Hans Grablowitz<sup>‡</sup>, Andreas Lendlein\*

*Institute for Polymer Research, GKSS Research Center Geesthacht GmbH, Kantstr. 55, 14513 Teltow, Germany,  
email: andreas.lendlein@gkss.de, \*to whom correspondence should be addressed, <sup>‡</sup>present address: Bayer  
Material Science AG, Leverkusen, Germany*

Table S1. Mass units of PPDO-diols synthesized with or without catalyst determined by MALDI-TOF MS analysis compared to calculated values of linear and cyclic structures.  $M_{pDO}$ : molar mass of *p*-dioxanone;  $M_{EG}$ : molar mass of ethylene glycol;  $M_K$ : molar mass of  $K^+$ ;  $M_{water}$ : molar mass of  $H_2O$ ;  $M_{Trifl}$ : molar mass of  $CF_3CO-$ .

| structure                                                                                     | m/z+       | m/z+                 | m/z+                   |
|-----------------------------------------------------------------------------------------------|------------|----------------------|------------------------|
|                                                                                               | calculated | no catalyst<br>found | with catalyst<br>found |
| linear macrodiol ( $10 \cdot M_{pDO} + M_{EG} + M_K$ )                                        | 1121.3     | 1121.3               | 1121.2                 |
| macrocycle ( $\{10+1\} \cdot M_{pDO} + M_K$ )                                                 | 1161.3     | -                    | 1161.3                 |
| linear macromonool<br>( $\{10+1\} \cdot M_{pDO} + M_{water} + M_K$ )                          | 1179.3     | 1179.3               | 1179.2                 |
| trifluoroacetat linear macrodiol<br>( $\{10\} \cdot M_{pDO} + M_{EG} + M_K + M_{Trifl} - 1$ ) | 1217.2     | 1217.2               | 1217.2                 |
| linear macrodiol ( $\{10+1\} \cdot M_{pDO} + M_{EG} + M_K$ )                                  | 1223.3     | 1223.3               | 1223.3                 |
| linear macrodiol ( $12 \cdot M_{pDO} + M_{EG} + M_K$ )                                        | 1325.4     | 1325.3               | 1325.3                 |
| macrocycle ( $\{12+1\} \cdot M_{pDO} + M_K$ )                                                 | 1365.3     | -                    | 1365.3                 |
| linear macromonool<br>( $\{12+1\} \cdot M_{pDO} + M_{water} + M_K$ )                          | 1383.4     | 1383.3               | 1383.2                 |
| trifluoroacetat linear macrodiol<br>( $\{12\} \cdot M_{pDO} + M_{EG} + M_K + M_{Trifl} - 1$ ) | 1421.4     | 1421.2               | 1421.2                 |
| linear macrodiol ( $\{12+1\} \cdot M_{pDO} + M_{EG} + M_K$ )                                  | 1427.4     | 1427.3               | 1427.3                 |
